# Supplementary material for: Serological and Molecular Characterization of Occult HBV Infection in Blood Donors from South Italy
Source: MDPI journal article supplement (doi:10.3390/v16010071), 2023-12-31
Supplement: s1 [file s1]

|                    | 100                             | 110                            | 120 | 130 | 140 | 150 |
|--------------------|---------------------------------|--------------------------------|-----|-----|-----|-----|
| Consensus D S-gene | LIFLLVLLDYQGMLPVCPLIPGSSTTSTG   | PCRTCTTPAQGTSMPSCCCTKPSDGNCTCI |     |     |     |     |
| 12-01A             | SR.I.PNL.N.VIR.M.AVPN.TN.F.I.E. |                                |     |     |     |     |
| 12-02A             | R.T.L.QF.AV.RN.T.F.T.E.         |                                |     |     |     |     |
| 12-04A             | R.T.L.N.IQ.M.AV.RN.T.F.NT.E.    |                                |     |     |     |     |
| 12-08A             | R.I.PNL.N.IG.NA.RK.TD.F.S.T.A.  |                                |     |     |     |     |
| 13-01A             | L.S.I.E.                        |                                |     |     |     |     |
| 13-05B             | L.S.YI.E.                       |                                |     |     |     |     |
| 13-08B             | L.S.YI.E.                       |                                |     |     |     |     |
| 13-09A             | L.S.YI.E.                       |                                |     |     |     |     |
| 13-09B             | L.S.YI.X.                       |                                |     |     |     |     |
| 14-03A             | FR.A.Q.LV.H.NTER.               |                                |     |     |     |     |
| 14-04B             | FR.A.Q.LV.H.NTER.               |                                |     |     |     |     |
| 14-05B             | FR.A.Q.LV.H.NTER.               |                                |     |     |     |     |
| 14-08B             | FR.A.Q.LV.H.NXER.               |                                |     |     |     |     |
| 14-10B             | FR.A.Q.LV.H.NTER.               |                                |     |     |     |     |
| 17-A               | I.T.R.T.                        |                                |     |     |     |     |
| 19-A               |                                 |                                |     |     |     |     |
| 19-B               |                                 |                                |     |     |     |     |
| 21-09A             | V.M.PL.N.R.S.L.I.P.I.E.         |                                |     |     |     |     |
| 21-10A             | V.M.PL.N.R.S.L.I.P.I.E.         |                                |     |     |     |     |
| 22-01A             | V.M.L.N.K.S.LP.H.CR.I.          |                                |     |     |     |     |
| 23-01B             | G.S.I.R.K.T.D.LVL.K.N.          |                                |     |     |     |     |
| 24-06B             | I.L.K.                          |                                |     |     |     |     |
| 24-10A             | I.L.K.                          |                                |     |     |     |     |
| 27-01A             | S.A.F.TNLT.M.T.                 |                                |     |     |     |     |
| 27-03A             | S.A.F.TNLT.M.T.X.               |                                |     |     |     |     |
| 27-08A             | A.TNLT.M.T.F.                   |                                |     |     |     |     |
| 33-A               | A.R.RN.                         |                                |     |     |     |     |
| 45-05A             | I.A.T.T.H.                      |                                |     |     |     |     |
| 45-06B             | I.A.T.T.H.                      |                                |     |     |     |     |
| 55-A               | A.I.                            |                                |     |     |     |     |
| 67-02A             | F.L.E.I.S.R.ET.T                |                                |     |     |     |     |
| 67-07B             | F.L.E.I.S.R.ET.T                |                                |     |     |     |     |
| 67-11A             | F.L.E.I.S.R.ET.T                |                                |     |     |     |     |
| 68-04B             | R.I.TR.A.PVSY.N.IT.N.F.H.E.     |                                |     |     |     |     |
| 69-08B             | L.TF.L.T.K.L.HA.T.              |                                |     |     |     |     |
| 75-A               | R.                              |                                |     |     |     |     |
| 79-01A             | R.                              |                                |     |     |     |     |
| 79-09A             | S.N.                            |                                |     |     |     |     |
| 37-03B             | C.R.K.IL.YS.                    |                                |     |     |     |     |
| 41-05A             | C.R.K.IL.YS.I.                  |                                |     |     |     |     |
| 41-09A             | T.F.N.R.M.V. ....               |                                |     |     |     |     |
| 48-08A             | X.TNLT.M.T.                     |                                |     |     |     |     |
| 48-11B             | S.L.V.R.L.                      |                                |     |     |     |     |
| 49-11A             | R.R.F.                          |                                |     |     |     |     |
| 51-06B             | R.E.Y.N.H.R.                    |                                |     |     |     |     |
| 58-09A             | I.A.S.L.                        |                                |     |     |     |     |
| 64-02A             | I.A.S.L.                        |                                |     |     |     |     |
| 64-05B             |                                 |                                |     |     |     |     |
| 96-04B             |                                 |                                |     |     |     |     |
| 78-9B              |                                 |                                |     |     |     |     |
| 78-11B             |                                 |                                |     |     |     |     |
| 82-2A              |                                 |                                |     |     |     |     |

|                    | 160                     | 170 |
|--------------------|-------------------------|-----|
| Consensus D S-gene | PIPSSWAFGKFLWEWASARF    |     |
| 12-01A             | H.....R.....            |     |
| 12-02A             | .....N.....L.....       |     |
| 12-04A             | .....N.....D.....       |     |
| 12-08A             | .....G.....             |     |
| 13-01A             | .....V.....             |     |
| 13-05B             | .....                   |     |
| 13-08B             | .....                   |     |
| 13-09A             | .....                   |     |
| 13-09B             | .....                   |     |
| 14-03A             | .....N.....H.....       |     |
| 14-04B             | .....N.....H.....       |     |
| 14-05B             | .....N.....             |     |
| 14-08B             | .....N.....X.....       |     |
| 14-10B             | .....N.....             |     |
| 17-A               | .....                   |     |
| 19-A               | .....                   |     |
| 19-B               | .....                   |     |
| 21-09A             | .....                   |     |
| 21-10A             | .....                   |     |
| 22-01A             | .....                   |     |
| 23-01B             | .....N.....             |     |
| 24-06B             | .....                   |     |
| 24-10A             | .....                   |     |
| 27-01A             | .....A.....             |     |
| 27-03A             | .....A.....             |     |
| 27-08A             | .....A.....             |     |
| 33-A               | .....L.....             |     |
| 45-05A             | .....                   |     |
| 45-06B             | .....                   |     |
| 55-A               | .....G.....             |     |
| 67-02A             | .....                   |     |
| 67-07B             | .....                   |     |
| 67-11A             | .....                   |     |
| 68-04B             | .....E.....             |     |
| 69-08B             | .....Q.....R.....G..... |     |
| 75-A               | .....S.....             |     |
| 79-01A             | .....V.....             |     |
| 79-09A             | .....V.....             |     |
| 37-03B             | .....                   |     |
| 41-05A             | .....                   |     |
| 41-09A             | .....                   |     |
| 48-08A             | .....A.....             |     |
| 48-11B             | .....A.....             |     |
| 49-11A             | .....                   |     |
| 51-06B             | L..Q.....N.....         |     |
| 58-09A             | .....V.....             |     |
| 64-02A             | .....                   |     |
| 64-05B             | .....                   |     |
| 96-04B             | .....                   |     |
| 78-9B              | .....                   |     |
| 78-11B             | .....                   |     |
| 82-2A              | .....                   |     |

Supplemental Figure 1. S-gene amino acids 91-170 sequences from OBI samples. Sequence ID contains donor number-replicate identifier. Sequences are aligned to consensus genotype-D sequence; identical to consensus amino acids are shown as dots.
