# Supplementary material for: Serological and Molecular Characterization of Occult HBV Infection in Blood Donors from South Italy
Source: MDPI journal article supplement (doi:10.3390/v16010071), 2023-12-31
Supplement: s1 [file s1]

Supplemental Table 1. Results of serological and molecular tests for occult HBV infections from 95 blood donors.

| Donor ID | Age at Donation (Years) | HBV-DNA QUALIT | HBV-DNA QUANT | HBsAg | HBcAb | Donation Date | Pos preS1-S PCR, Seq, N+/N PCR reps | Genotype | S-gene escape mutations                  | Comments                          | ARCH HBsAgNx, S/CO | RealTime HBV DNA, 0.5 ml, Log IU/ml | ARCH anti-HBc II 8L44, S/CO | ARCH anti-HBc II Interpretation | ARCH anti-HBs (AUSAB), mIU/mL | ARCH anti-HBs (AUSAB) Interpretation |
|----------|-------------------------|----------------|---------------|-------|-------|---------------|-------------------------------------|----------|------------------------------------------|-----------------------------------|--------------------|-------------------------------------|-----------------------------|---------------------------------|-------------------------------|--------------------------------------|
| 1        | 36                      | POS            | NEG           | NEG   | POS   | 16.01.2019    | 0/10                                | PCR neg  |                                          |                                   | 0.3                | TND                                 | 8.56                        | Reactive                        | 3.39                          | Nonreactive                          |
| 2        | 56                      | POS            | NEG           | NEG   | POS   | 20.03.2019    | 0/10                                | PCR neg  |                                          |                                   | 0.23               | TND                                 | 7.52                        | Reactive                        | 8.29                          | Grayzone                             |
| 3        | 59                      | POS            | NEG           | NEG   | POS   | 03.04.2019    | 0/18                                | PCR neg  |                                          |                                   | 0.29               | TND                                 | 7.63                        | Reactive                        | 679.04                        | Reactive                             |
| 4        | 53                      | POS            | NEG           | NEG   | POS   | 16.05.2019    | 0/6                                 | PCR neg  |                                          |                                   | 0.26               | TND                                 | 4.39                        | Reactive                        | 33.68                         | Reactive                             |
| 5        | 54                      | POS            | <10 UI/ML     | NEG   | POS   | 15.06.2019    | 0/24                                | PCR neg  |                                          |                                   | 0.3                | 1.11                                | 7.93                        | Reactive                        | 0.78                          | Nonreactive                          |
| 6        | 44                      | POS            | NEG           | NEG   | POS   | 17.07.2019    | 0/16                                | PCR neg  |                                          |                                   | 0.32               | TND                                 | 8.15                        | Reactive                        | 2.35                          | Nonreactive                          |
| 7        | 43                      | POS            | NEG           | NEG   | POS   | 07.08.2019    | 0/18                                | PCR neg  |                                          |                                   | 0.32               | TND                                 | 6.97                        | Reactive                        | 4.88                          | Nonreactive                          |
| 8        | 65                      | POS            | NEG           | NEG   | POS   | 31.08.2019    | 0/16                                | PCR neg  |                                          |                                   | 0.26               | 0.51                                | 4.93                        | Reactive                        | 0.55                          | Nonreactive                          |
| 9        | 60                      | POS            | NEG           | NEG   | POS   | 01.09.2019    | 0/14                                | PCR neg  |                                          |                                   | 0.25               | TND                                 | 6.34                        | Reactive                        | 28.54                         | Reactive                             |
| 10       | 54                      | POS            | NEG           | NEG   | POS   | 12.09.2019    | 0/22                                | PCR neg  |                                          |                                   | 0.28               | TND                                 | 5.46                        | Reactive                        | 8.15                          | Grayzone                             |
| 11       | 57                      | POS            | NEG           | NEG   | POS   | 01.10.2019    | 0/22                                | PCR neg  |                                          |                                   | 0.26               | TND                                 | 6.01                        | Reactive                        | 385.78                        | Reactive                             |
| 12       | 60                      | POS            | <10 UI/ML     | NEG   | POS   | 06.10.2019    | 4/20                                | D3       | A128V, M133T, Y134N, D144E               | 4 strains in #12                  | 0.27               | 0.98                                | 7.35                        | Reactive                        | 1.35                          | Nonreactive                          |
| 12       | 60                      | POS            | <10 UI/ML     | NEG   | POS   | 06.10.2019    | 4/20                                | D3       | P120Q, A128V, G130R, T131N, M133T, D144E | 4 strains in #12                  | 0.27               | 0.98                                | 7.35                        | Reactive                        | 1.35                          | Nonreactive                          |
| 12       | 60                      | POS            | <10 UI/ML     | NEG   | POS   | 06.10.2019    | 4/20                                | D3       | P120Q, A128V, G130R, T131N, M133T, D144E | 4 strains in #12                  | 0.27               | 0.98                                | 7.35                        | Reactive                        | 1.35                          | Nonreactive                          |
| 12       | 60                      | POS            | <10 UI/ML     | NEG   | POS   | 06.10.2019    | 4/20                                | D3       | T126N, Q129R, M133T, C139S, G145A        | 4 strains in #12                  | 0.27               | 0.98                                | 7.35                        | Reactive                        | 1.35                          | Nonreactive                          |
| 13       | 58                      | POS            | NEG           | NEG   | POS   | 20.10.2019    | 5/20                                | D3       | P120S, M133I, D144E                      | 4 strains in #13                  | 0.29               | TND                                 | 2.61                        | Reactive                        | 0.76                          | Nonreactive                          |
| 13       | 58                      | POS            | NEG           | NEG   | POS   | 20.10.2019    | 5/20                                | D3       | P120S, M133I, D144E                      | 4 strains in #13                  | 0.29               | TND                                 | 2.61                        | Reactive                        | 0.76                          | Nonreactive                          |
| 13       | 58                      | POS            | NEG           | NEG   | POS   | 20.10.2019    | 5/20                                | D3       | P120S, M133I, D144E                      | 4 strains in #13                  | 0.29               | TND                                 | 2.61                        | Reactive                        | 0.76                          | Nonreactive                          |
| 13       | 58                      | POS            | NEG           | NEG   | POS   | 20.10.2019    | 5/20                                | D3       | P120S, M133I, D144EG                     | 4 strains in #13                  | 0.29               | TND                                 | 2.61                        | Reactive                        | 0.76                          | Nonreactive                          |
| 14       | 51                      | POS            | <10 UI/ML     | NEG   | POS   | 03.11.2019    | 5/22                                | D4       | P120A, A128V, Y134H, D144E, G145R        | 2 strains, one with RT R169H      | 0.26               | 1.01                                | 6.35                        | Reactive                        | 90.94                         | Reactive                             |
| 14       | 51                      | POS            | <10 UI/ML     | NEG   | POS   | 03.11.2019    | 5/22                                | D4       | P120A, A128V, Y134H, D144E, G145R        | 2 strains, one with RT R169H      | 0.26               | 1.01                                | 6.35                        | Reactive                        | 90.94                         | Reactive                             |
| 15       | 59                      | POS            | NEG           | NEG   | POS   | 09.11.2019    | 0/4                                 | PCR neg  |                                          |                                   | 0.26               | TND                                 | 6.14                        | Reactive                        | 80.67                         | Reactive                             |
| 16       | 67                      | POS            | <10 UI/ML     | NEG   | POS   | 17.11.2019    | 0/20                                | PCR neg  |                                          |                                   | 0.27               | TND                                 | 5.54                        | Reactive                        | 30.38                         | Reactive                             |
| 17       | 52                      | POS            | <10 UI/ML     | NEG   | POS   | 22.11.2019    | 1/2                                 | D3       | P120T, Q129R, M133T                      |                                   | 0.29               | 0.06                                | 7.57                        | Reactive                        | 1.48                          | Nonreactive                          |
| 18       | 50                      | POS            | NEG           | NEG   | POS   | 28.12.2019    | 0/12                                | PCR neg  |                                          |                                   | 0.23               | TND                                 | 7.59                        | Reactive                        | 58.2                          | Reactive                             |
| 19       | 42                      | POS            | 2.55 10E1     | NEG   | POS   | 02.11.2017    | 2/2                                 | D4       | none                                     |                                   | 0.31               | 1.55                                | 0.07                        | Nonreactive                     | 0.31                          | Nonreactive                          |
| 20       | 56                      | POS            | <10 UI/ML     | NEG   | POS   | 23.02.2017    | 0/6                                 | PCR neg  |                                          |                                   | 0.28               | 0.71                                | 6.87                        | Reactive                        | 0.87                          | Nonreactive                          |
| 21       | 55                      | POS            | NEG           | NEG   | POS   | 08.04.2017    | 2/22                                | D3       | T118R, P120S, T126I, D144E               |                                   | 0.26               | 0.52                                | 7.8                         | Reactive                        | 5.1                           | Nonreactive                          |
| 22       | 56                      | POS            | NEG           | NEG   | POS   | 04.08.2017    | 1/20                                | D3       | T118K, P120S                             |                                   | 0.27               | 0.3                                 | 7.54                        | Reactive                        | 4.07                          | Nonreactive                          |
| 23       | 60                      | POS            | NEG           | NEG   | POS   | 04.10.2017    | 1/26                                | D3       | T118K, P120T, A128V, Y134N               |                                   | 0.25               | TND                                 | 7.85                        | Reactive                        | 22.79                         | Reactive                             |
| 24       | 61                      | POS            | NEG           | NEG   | POS   | 07.09.2017    | 2/22                                | D3       | T118K                                    |                                   | 0.3                | 0.5                                 | 7.43                        | Reactive                        | 6.19                          | Nonreactive                          |
| 25       | 65                      | POS            | <10 UI/ML     | NEG   | POS   | 19.09.2017    | 0/20                                | PCR neg  |                                          |                                   | 0.3                | 1                                   | 6.4                         | Reactive                        | 15.68                         | Reactive                             |
| 26       | 63                      | POS            | NEG           | NEG   | POS   | 07.11.2017    | 0/22                                | PCR neg  |                                          |                                   | 0.3                | TND                                 | 4.88                        | Reactive                        | 6.69                          | Nonreactive                          |
| 27       | 59                      | POS            | NEG           | NEG   | POS   | 14.11.2017    | 3/12                                | D3       | none                                     |                                   | 0.68               | TND                                 | 8.38                        | Reactive                        | 0                             | Nonreactive                          |
| 28       | 57                      | POS            | NEG           | NEG   | POS   | 28.07.2016    | 0/8                                 | PCR neg  |                                          |                                   | 0.38               | TND                                 | 4.98                        | Reactive                        | 74.41                         | Reactive                             |
| 29       | 54                      | POS            | NEG           | NEG   | POS   | 07.08.2016    | 0/8                                 | PCR neg  |                                          |                                   | 6.93/6.62/ 6.51    | TND                                 | 5.52                        | Reactive                        | 19.7                          | Reactive                             |
| 30       | 50                      | POS            | NEG           | NEG   | POS   | 13.08.2016    | 0/6                                 | PCR neg  |                                          |                                   | 36.96/37.23/37.1   | TND                                 | 0.52                        | Nonreactive                     | 0.69                          | Nonreactive                          |
| 31       | 58                      | POS            | <10 UI/ML     | NEG   | POS   | 27.08.2016    | 0/8                                 | PCR neg  |                                          |                                   | 8.03/8.35/8.66     | 1.49                                | 7.18                        | Reactive                        | 1.13                          | Nonreactive                          |
| 32       | 62                      | POS            | <10 UI/ML     | NEG   | POS   | 25.08.2016    | 0/4                                 | PCR neg  |                                          |                                   | 14.89/13.95/14.29  | 0.68                                | 6.73                        | Reactive                        | > 1000.00                     | Reactive                             |
| 33       | 63                      | POS            | <10 UI/ML     | NEG   | POS   | 11.01.2018    | 1/2                                 | D3       | none                                     |                                   | 0.25               | 0.67                                | 8.19                        | Reactive                        | 50.25                         | Reactive                             |
| 34       | 51                      | POS            | NEG           | NEG   | POS   | 22.01.2018    | 0/8                                 | PCR neg  |                                          |                                   | 0.29               | TND                                 | 6.2                         | Reactive                        | 36.87                         | Reactive                             |
| 35       | 68                      | POS            | NEG           | NEG   | POS   | 06.02.2018    | 0/10                                | PCR neg  |                                          |                                   | 0.25               | TND                                 | 5.62                        | Reactive                        | 62.17                         | Reactive                             |
| 37       | 45                      | POS            | <10 UI/ML     | NEG   | POS   | 13.03.2018    | 1/6                                 | D3       | 120S, 134N                               |                                   | 0.26               | TND                                 | 2.05                        | Reactive                        | 0.71                          | Nonreactive                          |
| 38       | 43                      | POS            | NEG           | NEG   | POS   | 13.06.2018    | 0/10                                | PCR neg  |                                          |                                   | 3.7/3.72/3.46      | 0.79                                | 8.1                         | Reactive                        | 0                             | Nonreactive                          |
| 39       | 50                      | POS            | NEG           | NEG   | POS   | 20.06.2018    | 0/8                                 | PCR neg  |                                          |                                   | 0.34               | TND                                 | 5.57                        | Reactive                        | 4.87                          | Nonreactive                          |
| 40       | 48                      | POS            | NEG           | NEG   | POS   | 05.11.2018    | Insufficient volume                 |          |                                          |                                   | 0.25               | TND                                 | 6.97                        | Reactive                        | 9.33                          | Grayzone                             |
| 41       | 58                      | POS            | NEG           | NEG   | POS   | 20.11.2018    | 2/18                                | D3       | 100C                                     |                                   | 0.27               | TND                                 | 7.23                        | Reactive                        | > 1000.00                     | Reactive                             |
| 43       | 59                      | POS            | NEG           | NEG   | POS   | 26.12.2018    | 0/4                                 | PCR neg  |                                          |                                   | 33.17/31.69/31.03  | 0.2                                 | 7.89                        | Reactive                        | 31.03                         | Reactive                             |
| 44       | 65                      | POS            | NEG           | NEG   | POS   | 24.03.2019    | 0/14                                | PCR neg  |                                          |                                   | 0.28               | TND                                 | 6.92                        | Reactive                        | 79.33                         | Reactive                             |
| 45       | 64                      | POS            | NEG           | NEG   | POS   | 08.12.2018    | 2/22                                | D2       | P120T, Y134H                             |                                   | 0.3                | 0.85                                | 7.39                        | Reactive                        | 0.15                          | Nonreactive                          |
| 46       | 50                      | POS            | NEG           | NEG   | POS   | 25.05.2020    | Insufficient volume                 |          |                                          |                                   | 0.24               | TND                                 | 7.82                        | Reactive                        | 24.02                         | Reactive                             |
| 47       | 50                      | POS            | NEG           | NEG   | POS   | 17.05.2020    | 0/22                                | PCR neg  |                                          |                                   | 0.24               | TND                                 | 8.05                        | Reactive                        | 16.58                         | Reactive                             |
| 48       | 61                      | POS            | <10 UI/ML     | NEG   | POS   | 20.06.2020    | 2/22                                | D3       | 118R, 133T                               | 2 strains, 1 w/o escape mutations | 0.25               | TND                                 | 8.55                        | Reactive                        | 0                             | Nonreactive                          |
| 49       | 65                      | POS            | NEG           | NEG   | POS   | 18.05.2020    | 1/24                                | D1       | none                                     | s W74*                            | 0.23               | TND                                 | 4.33                        | Reactive                        | 4.45                          | Nonreactive                          |
| 50       | 64                      | POS            | NEG           | NEG   | POS   | 24.04.2020    | 0/20                                | PCR neg  |                                          |                                   | 0.26               | TND                                 | 5.79                        | Reactive                        | 36.94                         | Reactive                             |

| Donor ID | Age at Donation (Years) | HBV-DNA QUALIT | HBV-DNA QUANT | HBsAg | HBcAb | Donation Date | Pos preS1-S PCR, Seq, N+/N PCR reps | Genotype | S-gene escape mutations                  | Comments | ARCH HBsAgNx, S/CO | RealTime HBV DNA, 0.5 ml, Log IU/ml | ARCH anti-HBc II 8L44, S/CO | ARCH anti-HBc II Interpretation | ARCH anti-HBs (AUSAB), mIU/mL | ARCH anti-HBs (AUSAB) Interpretation |
|----------|-------------------------|----------------|---------------|-------|-------|---------------|-------------------------------------|----------|------------------------------------------|----------|--------------------|-------------------------------------|-----------------------------|---------------------------------|-------------------------------|--------------------------------------|
| 51       | 55                      | POS            | NEG           | NEG   | POS   | 14.03.2020    | 1/22                                | D3       | 118R                                     | RT I169L | 0.26               | TND                                 | 7.03                        | Reactive                        | 18.7                          | Reactive                             |
| 52       | 55                      | POS            | NEG           | NEG   | POS   | 14.06.2020    | 0/22                                | PCR neg  |                                          |          | 0.24               | TND                                 | 7.38                        | Reactive                        | 70.77                         | Reactive                             |
| 53       | 60                      | POS            | <10 UI/ML     | NEG   | POS   | 25.10.2011    | 0/5                                 | PCR neg  |                                          |          | 0.25               | 1.33                                | 6.94                        | Reactive                        | 10.89                         | Grayzone                             |
| 54       | 58                      | POS            | <10 UI/ML     | NEG   | POS   | 23.07.2020    | 0/8                                 | PCR neg  |                                          |          | 0.23               | 1.09                                | 6.06                        | Reactive                        | 24.25                         | Reactive                             |
| 55       | 59                      | POS            | <10 UI/ML     | NEG   | POS   | 22.07.2020    | 1/2                                 | D3       | none                                     |          | 0.24               | 1.17                                | 7.22                        | Reactive                        | 1.16                          | Nonreactive                          |
| 57       | 57                      | POS            |               | NEG   | POS   | 02.08.2020    | 0/4                                 | PCR neg  |                                          |          | 0.28               | TND                                 | 7.56                        | Reactive                        | 10.84                         | Grayzone                             |
| 58       | 61                      | POS            |               | NEG   | POS   | 16.08.2020    | 1/20                                | D3       | none                                     |          | 0.24               | TND                                 | 0.97                        | Nonreactive                     | 98.2                          | Reactive                             |
| 59       | 68                      | POS            |               | NEG   | POS   | 16.08.2020    | 0/18                                | PCR neg  |                                          |          | 0.29               | TND                                 | 8.13                        | Reactive                        | 2.13                          | Nonreactive                          |
| 60       | 66                      | POS            |               | NEG   | POS   | 26.08.2020    | 0/20                                | PCR neg  |                                          |          | 0.26               | TND                                 | 6.34                        | Reactive                        | 202.03                        | Reactive                             |
| 61       | 51                      | POS            |               | NEG   | POS   | 28.08.2020    | 0/18                                | PCR neg  |                                          |          | 0.25               | TND                                 | 1.57                        | Reactive                        | 2.93                          | Nonreactive                          |
| 62       | 51                      | POS            |               | NEG   | POS   | 16.08.2020    | 0/18                                | PCR neg  |                                          |          | 0.23               | TND                                 | 2.26                        | Reactive                        | 7.88                          | Nonreactive                          |
| 63       | 58                      | POS            |               | NEG   | POS   | 16.08.2020    | 0/20                                | PCR neg  |                                          |          | 0.27               | TND                                 | 4.75                        | Reactive                        | 10.07                         | Grayzone                             |
| 64       | 58                      | POS            |               | NEG   | POS   | 25.08.2020    | 2/16                                | D3       | none                                     |          | 0.54               | TND                                 | 8.19                        | Reactive                        | 6.85                          | Nonreactive                          |
| 65       | 45                      | POS            |               | NEG   | POS   | 28.08.2020    | 0/18                                | PCR neg  |                                          |          | 0.22               | TND                                 | 3.51                        | Reactive                        | 16.56                         | Reactive                             |
| 66       | 55                      | POS            |               | NEG   | POS   | 06.09.2020    | 0/12                                | PCR neg  |                                          |          | 0.26               | TND                                 | 5.87                        | Reactive                        | 0.36                          | Nonreactive                          |
| 67       | 34                      | POS            |               | NEG   | POS   | 06.09.2020    | 3/26                                | D3       | Y134S, P142R, D144E                      |          | 0.31               | 0.72                                | 3.92                        | Reactive                        | 6.97                          | Nonreactive                          |
| 68       | 57                      | POS            |               | NEG   | POS   | 10.10.2020    | 1/18                                | D3       | C137W                                    |          | 0.32               | 1.16                                | 6.59                        | Reactive                        | 27.45                         | Reactive                             |
| 69       | 60                      | POS            |               | NEG   | POS   | 29.08.2020    | 1/18                                | D3       | P120S, C121Y, T123N, T126I, Y134N, D144E |          | 0.26               | 0.93                                | 7.75                        | Reactive                        | 2.14                          | Nonreactive                          |
| 70       | 61                      | POS            |               | NEG   | POS   | 03.10.2020    | 0/12                                | PCR neg  |                                          |          | 0.25               | TND                                 | 6.22                        | Reactive                        | 48.45                         | Reactive                             |
| 71       | 59                      | POS            |               | NEG   | POS   | 13.10.2020    | 0/12                                | PCR neg  |                                          |          | 0.25               | TND                                 | 3.27                        | Reactive                        | 47.3                          | Reactive                             |
| 72       | 50                      | POS            |               | NEG   | POS   | 18.10.2020    | 0/12                                | PCR neg  |                                          |          | 0.31               | TND                                 | 0.77                        | Nonreactive                     | 3.8                           | Nonreactive                          |
| 74       | 62                      | POS            |               | NEG   | POS   | 25.10.2020    | 0/6                                 | PCR neg  |                                          |          | 0.25               | TND                                 | 4.27                        | Reactive                        | 77.68                         | Reactive                             |
| 75       | 59                      | POS            |               | NEG   | POS   | 29.07.2020    | 1/2                                 | D4       | P120T,R122K, Q129H, M133T                |          | 0.3                | 0.72                                | 7.55                        | Reactive                        | 24.25                         | Reactive                             |
| 76       | 56                      | POS            |               | NEG   | POS   | 17.06.2020    | 0/10                                | PCR neg  |                                          |          | 0.24               | TND                                 | 5.95                        | Reactive                        | 5.07                          | Nonreactive                          |
| 77       | 61                      | POS            |               | NEG   | POS   | 03.10.2020    | 0/8                                 | PCR neg  |                                          |          | 0.28               | TND                                 | 6.38                        | Reactive                        | 49.26                         | Reactive                             |
| 78       | 69                      | POS            |               | NEG   | POS   | 21.11.2020    | 2/24                                | D3       | P120S, S143L                             |          | 0.3                | TND                                 | 6.59                        | Reactive                        | 0.51                          | Nonreactive                          |
| 79       | 57                      | POS            |               | NEG   | POS   | 29.11.2020    | 2/26                                | D3       | L109R                                    |          | 0.23               | 1.07                                | 5.58                        | Reactive                        | 16.4                          | Reactive                             |
| 80       | 55                      | POS            |               | NEG   | POS   | 19.12.2020    | 0/18                                | PCR neg  |                                          |          | 0.25               | 0.84                                | 8.23                        | Reactive                        | 13.3                          | Reactive                             |
| 81       | 56                      | POS            |               | NEG   | POS   | 14.02.2021    | 0/4                                 | PCR neg  |                                          |          | 0.68               | TND                                 | 8.51                        | Reactive                        | 4.56                          | Nonreactive                          |
| 82       | 65                      | POS            |               | NEG   | POS   | 13.12.2020    | 1/28                                | D4       | D144A                                    |          | 0.25               | TND                                 | 4.66                        | Reactive                        | 15.7                          | Reactive                             |
| 83       | 55                      | POS            |               | NEG   | POS   | 13.12.2020    | 0/24                                | PCR neg  |                                          |          | 0.23               | TND                                 | 7.17                        | Reactive                        | 14.42                         | Reactive                             |
| 84       | 62                      | POS            |               | NEG   | POS   | 18.12.2020    | 0/4                                 | PCR neg  |                                          |          | 0.25               | TND                                 | 6.32                        | Reactive                        | 9.89                          | Grayzone                             |
| 85       | 60                      | POS            |               | NEG   | POS   | 28.12.2020    | 0/2                                 | PCR neg  |                                          |          | 0.21               | TND                                 | 0.08                        | Nonreactive                     | 24.77                         | Reactive                             |
| 86       | 70                      | POS            |               | NEG   | POS   | 29.12.2020    | 0/24                                | PCR neg  |                                          |          | 0.25               | TND                                 | 3.31                        | Reactive                        | 585.34                        | Reactive                             |
| 87       | 56                      | POS            |               | NEG   | POS   | 29.12.2020    | 0/20                                | PCR neg  |                                          |          | 0.31               | TND                                 | 0.06                        | Nonreactive                     | 14.18                         | Reactive                             |
| 88       | 69                      | POS            |               | NEG   | POS   | 03.01.2021    | 0/20                                | PCR neg  |                                          |          | 0.27               | TND                                 | 6.91                        | Reactive                        | 0.64                          | Nonreactive                          |
| 89       | 42                      | POS            |               | NEG   | POS   | 17.01.2021    | 0/14                                | PCR neg  |                                          |          | 0.22               | TND                                 | 3.73                        | Reactive                        | 5.18                          | Nonreactive                          |
| 90       | 54                      | POS            |               | NEG   | POS   | 31.01.2021    | 0/2                                 | PCR neg  |                                          |          | 0.18               | TND                                 | 7.76                        | Reactive                        | 5.15                          | Nonreactive                          |
| 91       | 38                      | POS            |               | NEG   | POS   | 06.02.2021    | Insufficient volume                 |          |                                          |          | 0.18               | TND                                 | 7.78                        | Reactive                        | 2.16                          | Nonreactive                          |
| 92       | 54                      | POS            |               | NEG   | POS   | 08.11.2020    | 0/22                                | PCR neg  |                                          |          | 0.21               | TND                                 | 2.03                        | Reactive                        | 3.3                           | Nonreactive                          |
| 93       | 59                      | POS            |               | NEG   | POS   | 15.11.2020    | 0/22                                | PCR neg  |                                          |          | 0.31               | TND                                 | 7.06                        | Reactive                        | 13.05                         | Reactive                             |
| 94       | 62                      | POS            |               | NEG   | POS   | 15.11.2020    | 0/24                                | PCR neg  |                                          |          | 0.27               | TND                                 | 7.1                         | Reactive                        | 22.87                         | Reactive                             |
| 95       | 62                      | POS            |               | NEG   | POS   | 03.12.2020    | 0/22                                | PCR neg  |                                          |          | 0.26               | 0.8                                 | 6.95                        | Reactive                        | 12.58                         | Reactive                             |
| 96       | 44                      | POS            |               | NEG   | POS   | 08.12.2020    | 2/18                                | D3       | 121Y, 123N, 134H, 145R                   |          | 1.3/1.3/1.31       | 1.04                                | 8.21                        | Reactive                        | 0.4                           | Nonreactive                          |
| 97       | 52                      | POS            |               | NEG   | POS   | 06.12.2020    | 0/20                                | PCR neg  |                                          |          | 0.33               | TND                                 | 7.34                        | Reactive                        | > 1000.00                     | Reactive                             |
| 98       | 56                      | POS            |               | NEG   | POS   | 25.02.2021    | Insufficient volume                 |          |                                          |          | 0.23               | TND                                 | 7.29                        | Reactive                        | 45.26                         | Reactive                             |
| 99       | 63                      | POS            |               | NEG   | POS   | 02.03.2021    | 0/6                                 | PCR neg  |                                          |          | 0.21               | TND                                 | 6.44                        | Reactive                        | 31.15                         | Reactive                             |
